# Supplementary material for: Location and temporal memory of objects declines in aged marmosets (Callithrix jacchus)
Source: PubMed Central journal article supplement (PMC8080792; doi:10.1038/s41598-021-88357-7), 2021-04-28
Supplement: 41598_2021_88357_MOESM1_ESM.pdf [file 41598_2021_88357_MOESM1_ESM.pdf]

## Supplementary Information:

# Location and temporal memory of objects declines in aged marmosets (*Callithrix jacchus*).

### Authors:

Vanessa De Castro <sup>1,2\*</sup>, Pascal Girard <sup>1,3,\*</sup>.

### Affiliations:

<sup>1</sup> Centre de Recherche Cerveau et Cognition (CerCo), Toulouse (France).

<sup>2</sup> Centre National de la Recherche Scientifique (CNRS) - UMR 5549, Toulouse (France).

<sup>3</sup> Institut national de la santé et de la recherche médicale (INSERM), Toulouse (France).

### \*Correspondence:

Vanessa De Castro: [vanessa.decastro@cnrs.fr](mailto:vanessa.decastro@cnrs.fr)

Pascal Girard: [pascal.girard@cnrs.fr](mailto:pascal.girard@cnrs.fr)

**Supplementary Figure S1.** Exploratory behaviour in the www-task.

**Supplementary Figure S2.** Exploratory behaviour during the sample trials.

**Supplementary Table S1.** Duration of exploration during the sample trials.

**Supplementary Table S2.** Duration of exploration during the test trial.

**Supplementary Table S3.** Subjects kept for the statistical analysis.

**Supplementary Table S4.** Subjects excluded from the statistical analysis.

**Supplementary Table S5.** Subjects' inter-observer correlations during the test trial.

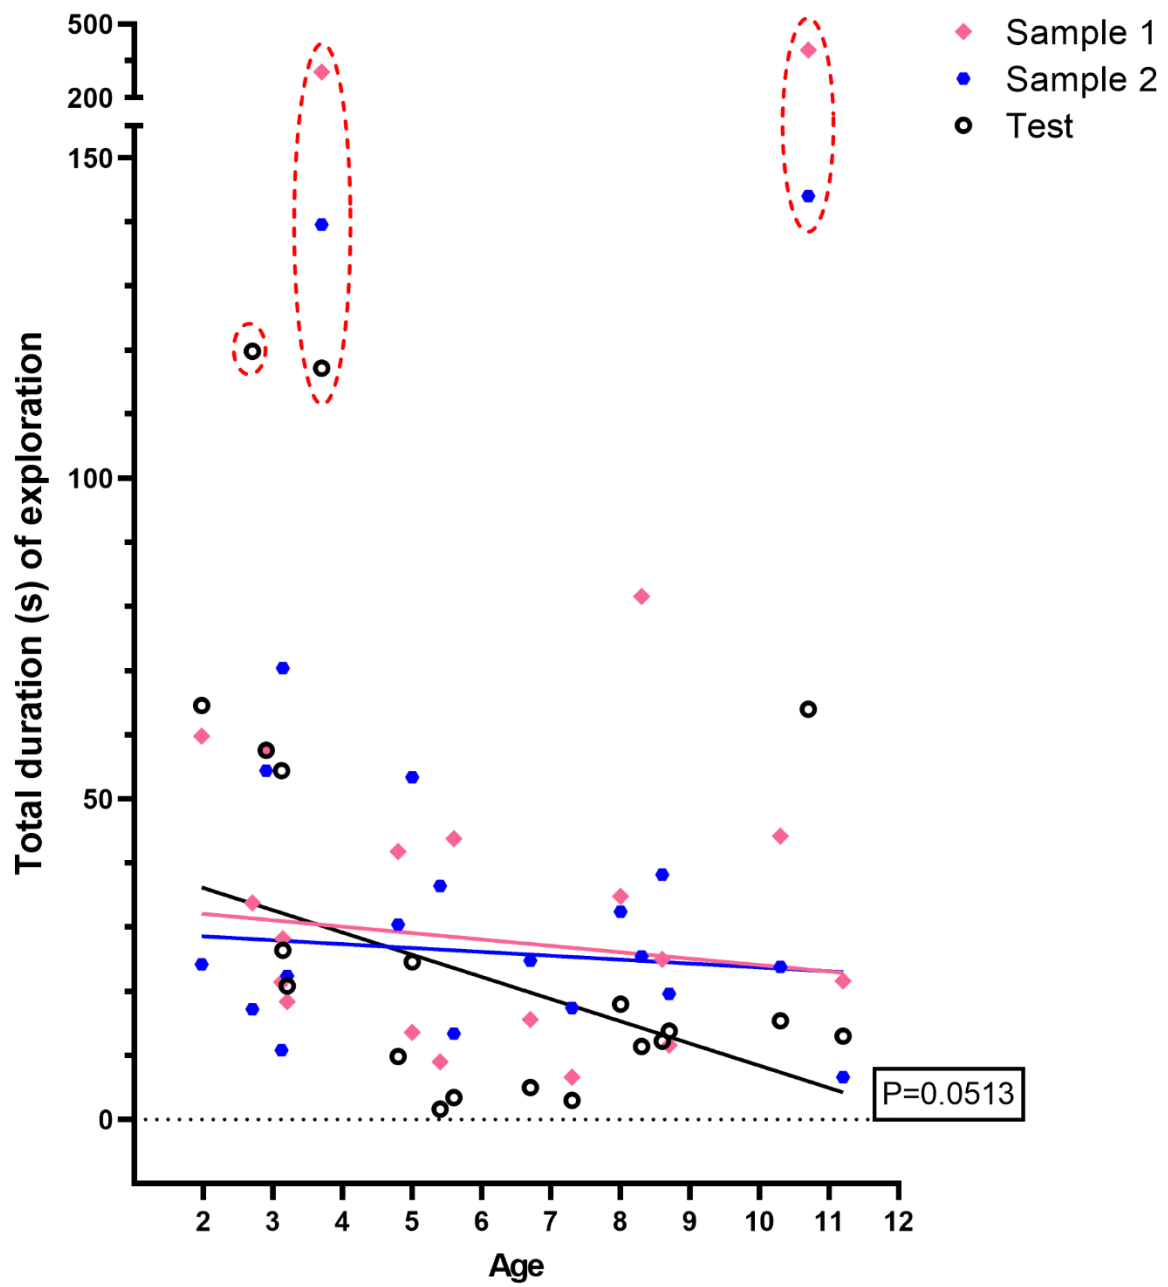

**Supplementary Figure S1. Exploratory behaviour in the www-task.** Individual values for the total duration (in seconds) of exploration in sample 1  $\blacklozenge$ , sample 2  $\bullet$  and test  $\circ$ . Straight lines represent the robust linear regression fit. Outliers  $\text{---}$ .

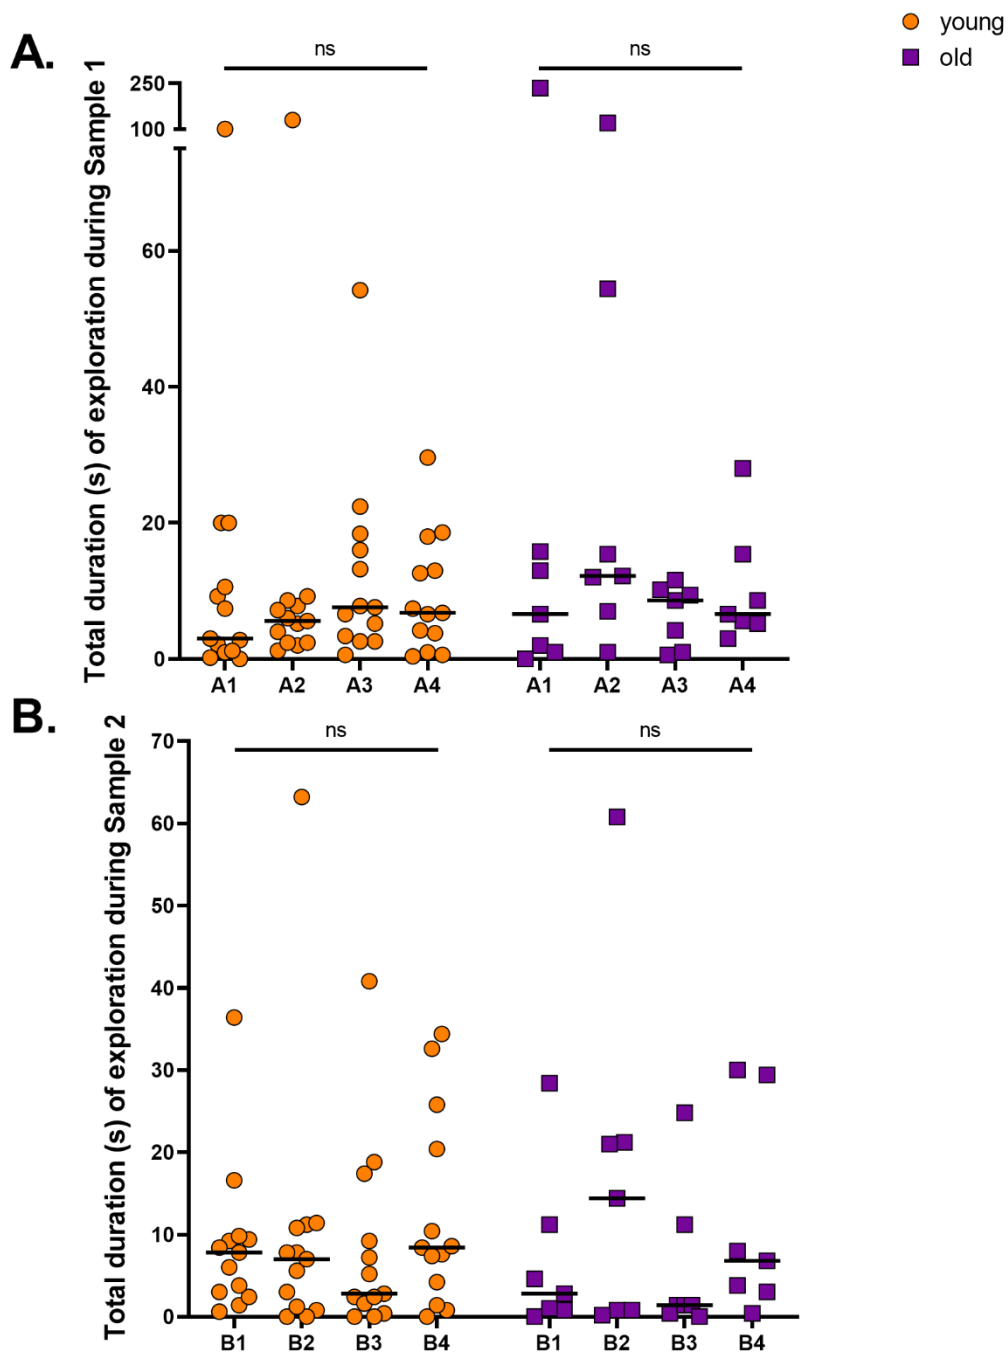

**Supplementary Figure S2. Exploratory behaviour during the sample trials.** (A) Total time of exploration (duration in seconds) by the different groups (young ●; old ■) of each identical objects (A1-A4) during sample 1. (B) Total time of exploration (duration in seconds) by the different groups (same symbols as in A) of each identical objects (B1-B4) during sample 1. Individual values are shown. The horizontal line represents the group median; ns: not significant.

Supplementary Table S1. Duration of exploration (in seconds) during the different sample trials

| Age  | Sample 1 |       |      |      |       | Sample 2 |      |      |      |       |
|------|----------|-------|------|------|-------|----------|------|------|------|-------|
|      | A1       | A2    | A3   | A4   | TT    | B1       | B2   | B3   | B4   | TT    |
| 1.97 | 9,2      | 7,8   | 13,2 | 29,6 | 59,8  | 9,4      | 7,8  | 2,8  | 4,2  | 24,2  |
| 2.7  | 2,8      | 5,2   | 7,8  | 18   | 33,8  | 6        | 0,8  | 0    | 10,4 | 17,2  |
| 2.9  | 20       | 8,6   | 16   | 13   | 57,6  | 9,2      | 5,6  | 5,2  | 34,4 | 54,4  |
| 3.12 | 2,2      | 9,2   | 3,4  | 6,6  | 21,4  | 0,6      | 7    | 2,4  | 0,8  | 10,8  |
| 3.14 | 3        | 6     | 6,6  | 12,6 | 28,2  | 7,8      | 11,2 | 18,8 | 32,6 | 70,4  |
| 3.2  | 7,4      | 2     | 5,2  | 3,8  | 18,4  | 3        | 11,4 | 0,4  | 7,6  | 22,4  |
| 3.7  | 101,4    | 130,8 | 54,2 | 18,6 | 305   | 9,8      | 63,2 | 40,8 | 25,8 | 139,6 |
| 4.8  | 20       | 2,4   | 18,4 | 1    | 41,8  | 8,4      | 0    | 1,6  | 20,4 | 30,4  |
| 5    | 0        | 5,6   | 0,6  | 7,4  | 13,6  | 16,6     | 10,8 | 17,4 | 8,6  | 53,4  |
| 5.4  | 1        | 1,2   | 2,6  | 4,2  | 9     | 36,4     | 0    | 0    | 0    | 36,4  |
| 5.6  | 10,6     | 4     | 22,4 | 6,8  | 43,8  | 1,4      | 1,2  | 2,4  | 8,4  | 13,4  |
| 6.7  | 0,2      | 7,2   | 7,6  | 0,6  | 15,6  | 2,4      | 7,8  | 7,2  | 7,4  | 24,8  |
| 7.3  | 1,2      | 2,4   | 2,6  | 0,4  | 6,6   | 3,8      | 3    | 9,2  | 1,4  | 17,4  |
| 8    | 15,8     | 15,4  | 0,6  | 3    | 34,8  | 0,8      | 0,8  | 1,4  | 29,4 | 32,4  |
| 8.3  | 13       | 54,4  | 8,6  | 5,6  | 81,6  | 0        | 21,2 | 0,4  | 3,8  | 25,4  |
| 8.6  | 2        | 12,2  | 4,2  | 6,6  | 25    | 4,6      | 14,4 | 11,2 | 8    | 38,2  |
| 8.7  | 1        | 1     | 1    | 8,6  | 11,6  | 11,2     | 0,2  | 1,4  | 6,8  | 19,6  |
| 10.3 | 6,6      | 12    | 10,2 | 15,4 | 44,2  | 1        | 21   | 1,4  | 0,4  | 23,8  |
| 10.7 | 235,2    | 120,4 | 11,6 | 28   | 395,2 | 28,4     | 60,8 | 24,8 | 30   | 144   |
| 11.2 | 0        | 7     | 9,4  | 5,2  | 21,6  | 2,8      | 0,8  | 0    | 3    | 6,6   |

Note: A1-A4: Set of identical objects presented during sample1. B1-B4: New set of identical objects presented during sample2.  
 TT: Total time of exploration grouping the 4 objects together in each sample. Orange: young age group; purple: old age group.

Supplementary Table S2. Duration of exploration (in seconds) during the test trial.

| Age  | Test             |                     |                 |                    | TT    |
|------|------------------|---------------------|-----------------|--------------------|-------|
|      | 'Old' stationary | 'Recent' stationary | 'Old' displaced | 'Recent' displaced |       |
| 1.97 | 12,4             | 19                  | 25,8            | 7,4                | 64,6  |
| 2.7  | 11,4             | 4,6                 | 38,2            | 65,6               | 119,8 |
| 2.9  | 15,8             | 8                   | 22,6            | 11,2               | 57,6  |
| 3.12 | 3                | 0                   | 31,2            | 20,2               | 54,4  |
| 3.14 | 2,4              | 5                   | 11              | 8                  | 26,4  |
| 3.2  | 0,2              | 0,4                 | 19,2            | 1                  | 20,8  |
| 3.7  | 47               | 25,8                | 28              | 16,4               | 117,2 |
| 4.8  | 0,6              | 4,6                 | 2,6             | 2                  | 9,8   |
| 5    | 3,2              | 13,8                | 5,8             | 1,8                | 24,6  |
| 5.4  | 0                | 0                   | 1,6             | 0                  | 1,6   |
| 5.6  | 0                | 0                   | 2,8             | 0,6                | 3,4   |
| 6.7  | 0                | 0                   | 3,8             | 1,2                | 5     |
| 7.3  | 0                | 0                   | 1,2             | 1,8                | 3     |
| 8    | 8                | 5,2                 | 0,8             | 4                  | 18    |
| 8.3  | 1,8              | 2                   | 2,2             | 5,4                | 11,4  |
| 8.6  | 0                | 1,6                 | 1,2             | 9,4                | 12,2  |
| 8.7  | 4,8              | 3                   | 3,6             | 2,4                | 13,8  |
| 10.3 | 0,6              | 2                   | 2               | 10,8               | 15,4  |
| 10.7 | 22,8             | 18,8                | 18,6            | 3,8                | 64    |
| 11.2 | 4                | 1,2                 | 1,6             | 6,2                | 13    |

Note: 'Old' objects: objects A from sample 1. 'Recent' objects: objects B from sample 2. TT: Total time of exploration.  
 Orange: young age group; purple: old age group.

*Supplementary Table S3. Subjects kept for statistical analysis.  
Sex, age, behavioural experience and breeding situation.*

| <b>Marmoset</b> | <b>Sex</b> | <b>Age (years)</b> | <b>Behavioral experience</b> | <b>Breeding situation</b> |
|-----------------|------------|--------------------|------------------------------|---------------------------|
| 3696289         | F          | 1,97               | naïve                        | yes / n=6                 |
| 3696273         | M          | 2,7                | touch screen / SD task       | no / n=3                  |
| 3696280         | M          | 2,9                | touch screen / SD task       | no / n=3                  |
| 3696270         | M          | 3,12               | touch screen / SD task       | no / n=3                  |
| 3696239         | M          | 3,14               | touch screen / SD task       | no / n=2                  |
| 3696278         | F          | 3,2                | naïve                        | yes / P / n=6             |
| 3696276         | F          | 3,7                | naïve                        | no / n=3                  |
| 3696327         | M          | 4,8                | naïve                        | no / n=2                  |
| 3696288         | F          | 5                  | naïve                        | no / n=2                  |
| 3592145         | F          | 5,4                | naïve                        | yes / P / n=6             |
| 3592143         | M          | 5,6                | Sadoun et al 2019            | no / n=3                  |
| 3592190         | M          | 6,7                | naïve                        | no / n=3                  |
| 3592216         | M          | 7,3                | naïve                        | no / n=3                  |
| 3287736         | F          | 8                  | Sadoun et al 2019            | no / n=2                  |
| 3287706         | M          | 8,3                | Sadoun et al 2019 (\$)       | no / n=3                  |
| 3287673         | F          | 8,6                | Sadoun et al 2019            | no / n=3                  |
| 3287755         | M          | 8,7                | Sadoun et al 2019            | no / n=3                  |
| 3287716         | F          | 10,3               | Sadoun et al 2019 (\$)       | no / n=2                  |
| 1822            | F          | 10,7               | Sadoun et al 2019 (\$)       | no / n=3                  |
| 1632            | F          | 11,2               | Sadoun et al 2019 (\$)       | no / n=2                  |

Note: outliers are indicated by <sup>^</sup>. <sup>^^</sup> sample 1, sample 2 and test; <sup>^</sup> test. Blue and yellow indicate different families. P: Progenitor; n: total number of animals in the cage; SD: simple discrimination task. \$ outliers in Sadoun et al., 2019.

*Supplementary Table S4. Subjects excluded from the statistical analysis.  
Sex, age, behavioural experience and breeding situation.*

| <b>Marmoset</b> | <b>Sex</b> | <b>Age (years)</b> | <b>Behavioral experience</b> | <b>Breeding situation</b> |
|-----------------|------------|--------------------|------------------------------|---------------------------|
| 3696260         | F          | 2,02               | naïve                        | no / n=3                  |
| 3696164         | F          | 2,3                | naïve                        | no / n=3                  |
| 3696256         | M          | 3,8                | naïve                        | no / n=3                  |
| 3592156         | M          | 5,6                | naïve                        | no / n=3                  |
| 3592189         | F          | 5,9                | Sadoun et al 2019 (\$)       | no / n=3                  |
| 3287697         | M          | 7,1                | Sadoun et al 2019 (\$)       | no / n=2                  |
| 3287758         | M          | 8,1                | Sadoun et al 2019 (\$)       | no / n=3                  |
| 1853            | M          | 10,7               | Sadoun et al 2019 (\$)       | no / n=2                  |
| 1582            | M          | 11,1               | Sadoun et al 2019            | no / n=2                  |
| 1761            | M          | 12                 | Sadoun et al 2019            | no / n=2                  |
| 1722            | M          | 14,3               | Sadoun et al 2019            | no / n=3                  |
| 1947            | F          | 15                 | Sadoun et al 2019 (\$)       | no / n=2                  |

Note: \$ animals that showed cognitive deficits in DMTP in Sadoun et al., 2019. n: total number of animals in the cage.

*Supplementary Table S5. Subjects' inter-observer correlations during the test trial.*

| <b>Marmoset</b> | <b>Sex</b> | <b>Age (years)</b> | <b>Spearman correlation r (95% CI)</b> | <b>P (two-tailed) value</b> |
|-----------------|------------|--------------------|----------------------------------------|-----------------------------|
| 3696289         | F          | 1,97               | 0.8631 (0.6729 to 0.9463)              | P<0.0001                    |
| 3696273         | M          | 2,7                | 0.7721 (0.4900 to 0.9078)              | P=0.0005                    |
| 3696280         | M          | 2,9                | 0.7893 (0.5228 to 0.9153)              | P<0.0001                    |
| 3696270         | M          | 3,12               | 0.7658 (0.4782 to 0.9050)              | P<0.0001                    |
| 3696239         | M          | 3,14               | 0.8178 (0.5789 to 0.9274)              | P<0.0001                    |
| 3696278         | F          | 3,2                | 0.8196 (0.5828 to 0.9282)              | P<0.0001                    |
| 3696276         | F          | 3,7                | 0.8321 (0.6079 to 0.9334)              | P<0.0001                    |
| 3696327         | M          | 4,8                | 0.9368 (0.8404 to 0.9758)              | P<0.0001                    |
| 3696288         | F          | 5                  | 0.8044 (0.5523 to 0.9217)              | P<0.0001                    |
| 3592145         | F          | 5,4                | 0.9986 (0.9963 to 0.9995)              | P<0.0001                    |
| 3592143         | M          | 5,6                | 0.9160 (0.7909 to 0.9676)              | P<0.0001                    |
| 3592190         | M          | 6,7                | 0.8587 (0.6635 to 0.9445)              | P<0.0001                    |
| 3592216         | M          | 7,3                | 0.9908 (0.9756 to 0.9965)              | P<0.0001                    |
| 3287736         | F          | 8                  | 0.7498 (0.4487 to 0.8980)              | P<0.0001                    |
| 3287706         | M          | 8,3                | 0.8939 (0.7404 to 0.9588)              | P<0.0001                    |
| 3287673         | F          | 8,6                | 0.7702 (0.4864 to 0.9070)              | P<0.0001                    |
| 3287755         | M          | 8,7                | 0.9589 (0.8914 to 0.9844)              | P<0.0001                    |
| 3287716         | F          | 10,3               | 0.7952 (0.5341 to 0.9178)              | P<0.0001                    |
| 1822            | F          | 10,7               | 0.9749 (0.9345 to 0.9905)              | P<0.0001                    |
| 1632            | F          | 11,2               | 0.7988 (0.5412 to 0.9193)              | P<0.0001                    |
